# Supplementary material for: Barium fluoroiodate crystals with a large band gap and birefringence
Source: Royal Society of Chemistry journal article supplement (doi:10.1039/d1qi00383f), 2021-01-01
Supplement: d1qi00383f1.pdf [file d1qi00383f1.pdf]

## Electronic Supplementary Information

### Two Barium Fluoroiodate Crystals with Large Band Gap and Birefringence

Liang Zhu,<sup>a,b,#</sup> Minqiang Gai,<sup>a,#</sup> Wenqi Jin,<sup>a,b</sup> Yun Yang,<sup>a,b,\*</sup>

Zihua Yang<sup>a,b</sup> and Shilie Pan<sup>a,b,\*</sup>

<sup>a</sup>CAS Key Laboratory of Functional Materials and Devices for Special Environments; Xinjiang Technical Institute of Physics & Chemistry, CAS; Xinjiang Key Laboratory of Electronic Information Materials and Devices, 40-1 South Beijing Road, Urumqi 830011, China.

<sup>b</sup>Center of Materials Science and Optoelectronics Engineering, University of Chinese Academy of Sciences, Beijing 100049, China.

<sup>#</sup>These authors contributed equally to this work.

\*Corresponding author: slpan@ms.xjb.ac.cn.

**Table S1.** Fractional atomic coordinates ( $\times 10^4$ ), equivalent isotropic displacement parameters ( $\text{\AA}^2 \times 10^3$ ) and bond valence sum (BVS) calculations for  $\text{Ba}_2\text{O}_5\text{F}_2$ .  $U(\text{eq})$  is defined as one-third of the trace of the orthogonalized  $U_{ij}$  tensor.

| Atom  | x       | y       | z       | $U(\text{eq})$ | BVS  |
|-------|---------|---------|---------|----------------|------|
| Ba(1) | 4045(1) | 1622(1) | 2601(1) | 10(1)          | 2.04 |
| I(1)  | 7258(1) | 1746(1) | 1469(1) | 8(1)           | 5.19 |
| I(2)  | 654(1)  | 1200(1) | 3368(1) | 11(1)          | 5.06 |
| O(1)  | 6280(4) | 112(5)  | 2006(5) | 16(1)          | 2.33 |
| O(2)  | 963(4)  | -949(6) | 4264(6) | 22(1)          | 1.78 |
| O(3)  | 1253(4) | 968(7)  | 1695(5) | 23(1)          | 2.07 |
| O(4)  | 6721(4) | 1455(5) | -714(5) | 15(1)          | 2.17 |
| O(5)  | 8816(4) | 331(5)  | 1976(5) | 16(1)          | 2.18 |
| F(1)  | 2592(3) | 1902(5) | 4734(4) | 19(1)          | 0.98 |
| F(2)  | 5389(3) | 3425(4) | 897(4)  | 14(1)          | 1.00 |

**Table S2.** Selected Bond lengths (Å) and angles (deg.) for Ba<sub>2</sub>O<sub>5</sub>F<sub>2</sub>.

| Ba <sub>2</sub> O <sub>5</sub> F <sub>2</sub> |            |                     |            |
|-----------------------------------------------|------------|---------------------|------------|
| Ba(1)-F(1)                                    | 2.790(4)   | Ba(1)-O(1)          | 2.861(4)   |
| Ba(1)-F(1)#1                                  | 2.678(3)   | Ba(1)-O(1)#3        | 2.711(4)   |
| Ba(1)-F(2)                                    | 2.746(3)   | Ba(1)-O(3)          | 2.878(4)   |
| Ba(1)-F(2)#2                                  | 2.711(3)   | Ba(1)-O(4)#2        | 3.114(4)   |
| Ba(1)-F(2)#4                                  | 2.723(3)   | Ba(1)-O(4)#5        | 2.807(4)   |
| I(1)-O(1)                                     | 1.785(4)   | I(2)-O(3)           | 1.772(4)   |
| I(1)-O(4)                                     | 1.781(4)   | I(2)-O(5)#6         | 2.043(4)   |
| I(1)-O(5)                                     | 1.913(4)   | I(1)-F(2)           | 2.289(3)   |
| I(2)-O(2)                                     | 1.789(4)   | I(2)-F(1)           | 2.085(3)   |
| F(1)#1-Ba(1)-F(2)#2                           | 155.04(11) | F(1)#1-Ba(1)-O(1)#3 | 69.24(12)  |
| F(2)#2-Ba(1)-O(1)#3                           | 85.88(11)  | F(1)#1-Ba(1)-F(2)#4 | 141.05(10) |
| F(2)#2-Ba(1)-F(2)#4                           | 62.46(11)  | O(1)#3-Ba(1)-F(2)#4 | 146.26(11) |
| F(1)#1-Ba(1)-F(2)                             | 63.15(10)  | F(2)#2-Ba(1)-F(2)   | 111.95(11) |
| O(1)#3-Ba(1)-F(2)                             | 72.06(12)  | F(2)#4-Ba(1)-F(2)   | 128.67(7)  |
| F(1)#1-Ba(1)-F(1)                             | 106.92(11) | F(2)#2-Ba(1)-F(1)   | 62.16(10)  |
| O(1)#3-Ba(1)-F(1)                             | 73.68(12)  | F(2)#4-Ba(1)-F(1)   | 80.87(10)  |
| F(2)-Ba(1)-F(1)                               | 145.59(10) | F(1)#1-Ba(1)-O(4)#5 | 81.41(11)  |
| F(2)#2-Ba(1)-O(4)#5                           | 122.81(10) | O(1)#3-Ba(1)-O(4)#5 | 149.56(12) |
| F(2)#4-Ba(1)-O(4)#5                           | 60.36(11)  | F(2)-Ba(1)-O(4)#5   | 102.22(11) |
| F(1)-Ba(1)-O(4)#5                             | 108.86(11) | F(1)#1-Ba(1)-O(1)   | 105.50(12) |
| F(2)#2-Ba(1)-O(1)                             | 89.92(11)  | O(1)#3-Ba(1)-O(1)   | 124.50(11) |
| F(2)#4-Ba(1)-O(1)                             | 70.13(11)  | F(2)-Ba(1)-O(1)     | 58.64(11)  |
| F(1)-Ba(1)-O(1)                               | 147.02(11) | O(4)#5-Ba(1)-O(1)   | 70.28(12)  |
| F(1)#1-Ba(1)-O(3)                             | 65.96(12)  | F(2)#2-Ba(1)-O(3)   | 114.78(11) |
| O(1)#3-Ba(1)-O(3)                             | 92.06(13)  | F(2)#4-Ba(1)-O(3)   | 91.13(12)  |
| F(2)-Ba(1)-O(3)                               | 129.07(11) | F(1)-Ba(1)-O(3)     | 55.02(11)  |
| O(4)#5-Ba(1)-O(3)                             | 67.92(13)  | O(1)-Ba(1)-O(3)     | 138.12(12) |
| F(1)#1-Ba(1)-O(4)#2                           | 113.07(11) | F(2)#2-Ba(1)-O(4)#2 | 55.78(10)  |
| O(1)#3-Ba(1)-O(4)#2                           | 67.72(11)  | F(2)#4-Ba(1)-O(4)#2 | 100.07(10) |
| F(2)-Ba(1)-O(4)#2                             | 56.24(10)  | F(1)-Ba(1)-O(4)#2   | 107.03(10) |
| O(4)#5-Ba(1)-O(4)#2                           | 134.80(8)  | O(1)-Ba(1)-O(4)#2   | 64.63(11)  |
| O(3)-Ba(1)-O(4)#2                             | 157.25(12) | O(4)-I(1)-O(5)      | 96.71(18)  |
| O(4)-I(1)-O(1)                                | 100.17(19) | O(4)-I(1)-F(2)      | 83.93(16)  |
| O(1)-I(1)-O(5)                                | 95.57(19)  | O(5)-I(1)-F(2)      | 179.19(16) |
| O(1)-I(1)-F(2)                                | 83.82(15)  | O(3)-I(2)-O(5)#6    | 92.10(19)  |
| O(3)-I(2)-O(2)                                | 101.1(2)   | O(3)-I(2)-F(1)      | 85.12(17)  |
| O(2)-I(2)-O(5)#6                              | 87.66(18)  | O(5)#6-I(2)-F(1)    | 175.35(15) |

Symmetry transformations used to generate equivalent atoms:

#1  $x, -y+1/2, z-1/2$ ;#2  $x, -y+1/2, z+1/2$ ;#3  $-x+1, y+1/2, -z+1/2$ ;#4  $-x+1, y-1/2, -z+1/2$ ;#5  $-x+1, -y, -z$ ;#6  $x-1, y, z$ ;#7  $x+1, y, z$

**Table S3.** Fractional atomic coordinates ( $\times 10^4$ ), equivalent isotropic displacement parameters ( $\text{\AA}^2 \times 10^3$ ) and bond valence sum (BVS) calculations for  $\text{BaIO}_2\text{F}_3$ .  $U(\text{eq})$  is defined as one-third of the trace of the orthogonalized  $U_{ij}$  tensor.

| Atom | x       | y       | z       | $U(\text{eq})$ | BVS  |
|------|---------|---------|---------|----------------|------|
| Ba1  | 5000    | 2606(1) | 608(1)  | 11(1)          | 2.01 |
| I1   | 0       | 3050(1) | 1677(1) | 10(1)          | 4.98 |
| O1   | 2161(5) | 4644(4) | 1454(1) | 21(1)          | 2.12 |
| F1   | 7602(5) | 5000    | 0       | 13(1)          | 1.14 |
| F2   | 0       | 1974(5) | 842(1)  | 20(1)          | 1.15 |
| F3   | 0       | 4321(6) | 2427(2) | 36(1)          | 1.24 |

**Table S4.** Selected Bond lengths (Å) and angles (deg.) for BaO<sub>2</sub>F<sub>3</sub>.

| BaO <sub>2</sub> F <sub>3</sub>                             |                    |                      |                   |
|-------------------------------------------------------------|--------------------|----------------------|-------------------|
| Ba(1)-F(1)                                                  | 2.6512(19)         | Ba(1)-O(1)           | 2.965(3)          |
| Ba(1)-F(1)#1                                                | 2.6512(19)         | Ba(1)-O(1)#5         | 2.965(3)          |
| Ba(1)-F(1)#2                                                | 2.6545(17)         | Ba(1)-O(1)#6         | 3.048(3)          |
| Ba(1)-F(1)#3                                                | 2.6545(17)         | Ba(1)-O(1)#7         | 3.048(3)          |
| Ba(1)-F(2)                                                  | 3.2384(9)          | Ba(1)-F(2)#4         | 2.824(3)          |
| Ba(1)-F(2)#8                                                | 3.2384(9)          | I(1)-O(1)            | 1.779(3)          |
| I(1)-F(2)                                                   | 2.060(3)           | I(1)-O(1)#9          | 1.779(3)          |
| I(1)-F(3)                                                   | 1.924(4)           | F(1)#1-Ba(1)-F(1)    | 76.86(10)         |
| F(1)#1-Ba(1)-F(1)#2                                         | 73.486(14)         | F(1)-Ba(1)-F(1)#2    | 115.283(17)       |
| F(1)#1-Ba(1)-F(1)#3                                         | 115.283(17)        | F(1)-Ba(1)-F(1)#3    | 73.486(14)        |
| F(1)#2-Ba(1)-F(1)#3                                         | 69.81(10)          | F(1)#1-Ba(1)-F(2)#4  | 62.70(5)          |
| F(1)-Ba(1)-F(2)#4                                           | 62.70(5)           | F(1)#2-Ba(1)-F(2)#4  | 135.57(5)         |
| F(1)#3-Ba(1)-F(2)#4                                         | 135.57(5)          | F(1)#1-Ba(1)-O(1)#5  | 118.85(6)         |
| F(1)-Ba(1)-O(1)#5                                           | 74.26(7)           | F(1)#2-Ba(1)-O(1)#5  | 166.75(6)         |
| F(1)#3-Ba(1)-O(1)#5                                         | 106.23(7)          | F(2)#4-Ba(1)-O(1)#5  | 56.20(7)          |
| F(1)#1-Ba(1)-O(1)                                           | 74.27(7)           | F(1)-Ba(1)-O(1)      | 118.85(6)         |
| F(1)#2-Ba(1)-O(1)                                           | 106.23(7)          | F(1)#3-Ba(1)-O(1)    | 166.75(6)         |
| F(2)#4-Ba(1)-O(1)                                           | 56.20(7)           | O(1)#5-Ba(1)-O(1)    | 74.65(11)         |
| F(1)#1-Ba(1)-O(1)#6                                         | 114.81(7)          | F(1)-Ba(1)-O(1)#6    | 167.92(7)         |
| F(1)#2-Ba(1)-O(1)#6                                         | 72.82(6)           | F(1)#3-Ba(1)-O(1)#6  | 102.62(6)         |
| F(2)#4-Ba(1)-O(1)#6                                         | 118.66(8)          | O(1)#5-Ba(1)-O(1)#6  | 96.36(9)          |
| O(1)-Ba(1)-O(1)#6                                           | 64.29(5)           | F(1)#1-Ba(1)-O(1)#7  | 167.92(7)         |
| F(1)-Ba(1)-O(1)#7                                           | 114.81(7)          | F(1)#2-Ba(1)-O(1)#7  | 102.62(6)         |
| F(1)#3-Ba(1)-O(1)#7                                         | 72.82(6)           | F(2)#4-Ba(1)-O(1)#7  | 118.66(8)         |
| O(1)#5-Ba(1)-O(1)#7                                         | 64.29(5)           | O(1)-Ba(1)-O(1)#7    | 96.36(9)          |
| O(1)#6-Ba(1)-O(1)#7                                         | 53.37(11)          | F(1)#1-Ba(1)-F(2)#8  | 140.24(8)         |
| F(1)-Ba(1)-F(2)#8                                           | 63.46(8)           | F(1)#2-Ba(1)-F(2)#8  | 124.93(7)         |
| F(1)#3-Ba(1)-F(2)#8                                         | 56.87(7)           | F(2)#4-Ba(1)-F(2)#8  | 95.09(5)          |
| O(1)#5-Ba(1)-F(2)#8                                         | 49.37(8)           | O(1)-Ba(1)-F(2)#8    | 122.32(8)         |
| O(1)#6-Ba(1)-F(2)#8                                         | 104.71(8)          | O(1)#7-Ba(1)-F(2)#8  | 51.36(8)          |
| F(1)#1-Ba(1)-F(2)                                           | 63.46(8)           | F(1)-Ba(1)-F(2)      | 140.24(7)         |
| F(1)#2-Ba(1)-F(2)                                           | 56.87(7)           | F(1)#3-Ba(1)-F(2)    | 124.93(7)         |
| F(2)#4-Ba(1)-F(2)                                           | 95.09(5)           | O(1)#5-Ba(1)-F(2)    | 122.32(8)         |
| O(1)-Ba(1)-F(2)                                             | 49.37(8)           | O(1)#6-Ba(1)-F(2)    | 51.36(8)          |
| O(1)#7-Ba(1)-F(2)                                           | 104.71(8)          | F(2)#8-Ba(1)-F(2)    | 155.86(11)        |
| O(1)#9-I(1)-F(3)                                            | 91.51(12)          | O(1)#9-I(1)-O(1)     | 100.64(19)        |
| O(1)#9-I(1)-F(2)                                            | 85.03(11)          | O(1)-I(1)-F(3)       | 91.51(12)         |
| F(3)-I(1)-F(2)                                              | 174.57(15)         | O(1)-I(1)-F(2)       | 85.03(11)         |
| Symmetry transformations used to generate equivalent atoms: |                    |                      |                   |
| #1 -x+1,-y+1,-z;                                            | #2 x-1/2,y-1/2,z;  | #3 -x+3/2,-y+1/2,-z; | #4 x+1/2,y+1/2,z; |
| #5 -x+1,y,z;                                                | #6 -x+1/2,y-1/2,z; | #7 x+1/2,y-1/2,z;    | #8 x+1,y,z;       |
| #9 -x,y,z;                                                  | #10 x-1/2,y+1/2,z; | #11 x-1,y,z          |                   |

**Table S5.** The investigation of anionic units in fluoroiodates.

| Compounds                                                                                            | Constitutional unit                              | Birefringence @ 1064 (cal.) | Band gap (cal.) | References            |
|------------------------------------------------------------------------------------------------------|--------------------------------------------------|-----------------------------|-----------------|-----------------------|
| Cs(IOF <sub>4</sub> )                                                                                | (IOF <sub>4</sub> ) <sup>-</sup>                 | —                           | —               | 1                     |
| SbF <sub>5</sub> IF <sub>3</sub> O <sub>2</sub>                                                      | (IO <sub>2</sub> F <sub>4</sub> ) <sup>-</sup>   | —                           | —               | 2                     |
| Cs <sub>3</sub> (IO <sub>2</sub> F <sub>2</sub> ) <sub>3</sub> ·H <sub>2</sub> O                     | (IO <sub>2</sub> F <sub>2</sub> ) <sup>-</sup>   | 0.093                       | 4.37 eV         | 3                     |
| [N(CH <sub>3</sub> ) <sub>4</sub> ][IO <sub>2</sub> F <sub>2</sub> ]                                 | (IO <sub>2</sub> F <sub>2</sub> ) <sup>-</sup>   | —                           | —               | 4                     |
| (N(CH <sub>3</sub> ) <sub>4</sub> ) <sub>2</sub> (IO <sub>2</sub> F <sub>2</sub> )(HF <sub>2</sub> ) | (IO <sub>2</sub> F <sub>2</sub> ) <sup>-</sup>   | —                           | —               | 4                     |
| (C(NH <sub>2</sub> ) <sub>3</sub> )(IF <sub>2</sub> O <sub>2</sub> )                                 | (IO <sub>2</sub> F <sub>2</sub> ) <sup>-</sup>   | —                           | —               | 5                     |
| Cs(IO <sub>2</sub> F <sub>2</sub> ) <sub>2</sub> ·H <sub>5</sub> O <sub>2</sub>                      | (IO <sub>2</sub> F <sub>2</sub> ) <sup>-</sup>   | 0.086                       | 3.77 eV         | 3                     |
| NaIO <sub>2</sub> F <sub>2</sub>                                                                     | (IO <sub>2</sub> F <sub>2</sub> ) <sup>-</sup>   | —                           | —               | 6                     |
| KIO <sub>2</sub> F <sub>2</sub>                                                                      | (IO <sub>2</sub> F <sub>2</sub> ) <sup>-</sup>   | 0.06                        | —               | 7                     |
| RbIO <sub>2</sub> F <sub>2</sub>                                                                     | (IO <sub>2</sub> F <sub>2</sub> ) <sup>-</sup>   | 0.058                       | 4.28 eV         | 8                     |
| CsIO <sub>2</sub> F <sub>2</sub>                                                                     | (IO <sub>2</sub> F <sub>2</sub> ) <sup>-</sup>   | 0.046                       | 4.15 eV         | 3                     |
| Ba(IO <sub>2</sub> F <sub>2</sub> ) <sub>2</sub>                                                     | (IO <sub>2</sub> F <sub>2</sub> ) <sup>-</sup>   | 0.092                       | 3.99 eV         | 9                     |
| <b>BaIO<sub>2</sub>F<sub>3</sub></b>                                                                 | <b>(IO<sub>2</sub>F<sub>2</sub>)<sup>-</sup></b> | <b>0.133</b>                | <b>4.17 eV</b>  | <b>Title compound</b> |
| SrI <sub>2</sub> O <sub>5</sub> F <sub>2</sub>                                                       | (IO <sub>3</sub> F) <sup>2-</sup>                | 0.180                       | 3.68 eV         | 9                     |
| <b>BaI<sub>2</sub>O<sub>5</sub>F<sub>2</sub></b>                                                     | <b>(IO<sub>3</sub>F)<sup>2-</sup></b>            | <b>0.164</b>                | <b>3.95 eV</b>  | <b>Title compound</b> |

**Figure S1.** Experimental and calculated powder XRD patterns of  $\text{Ba}_2\text{O}_5\text{F}_2$  (a) and  $\text{BaO}_2\text{F}_3$  (b).

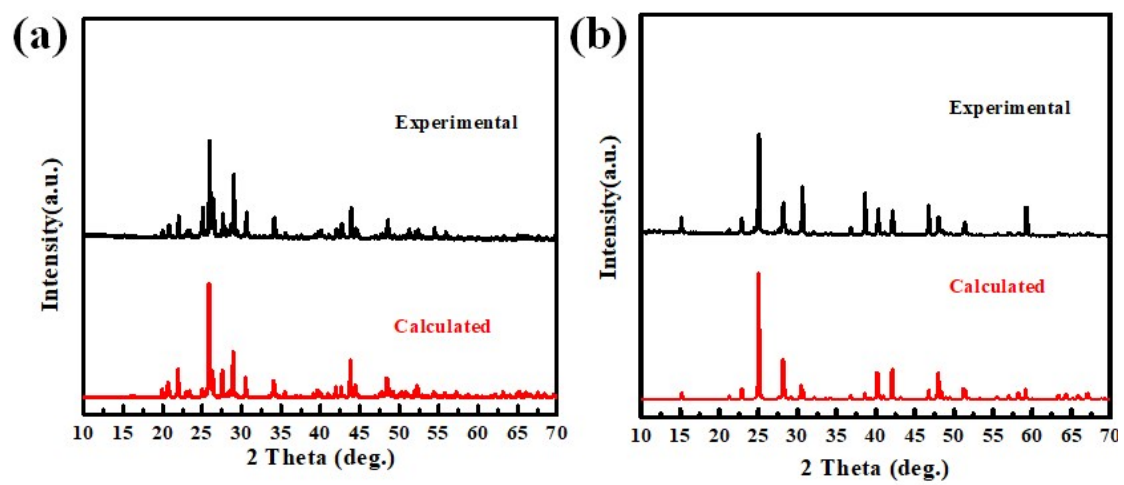

**Figure S2.** Elemental analysis of  $\text{BaI}_2\text{O}_5\text{F}_2$  (a) and  $\text{BaI}_2\text{O}_2\text{F}_3$  (b). Energy dispersive X-ray spectroscopy (EDS) was performed to verify the presence of the F and O atoms.

**(a)**

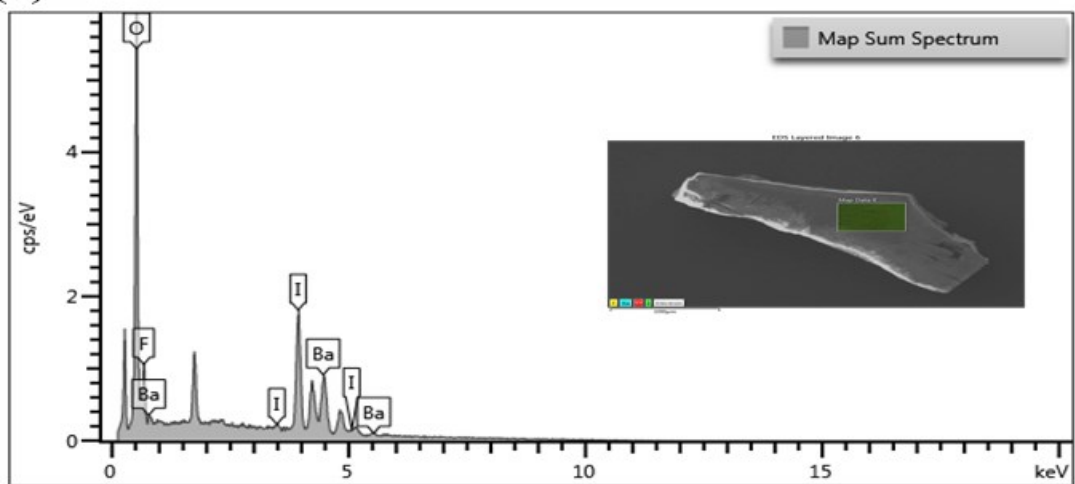

**(b)**

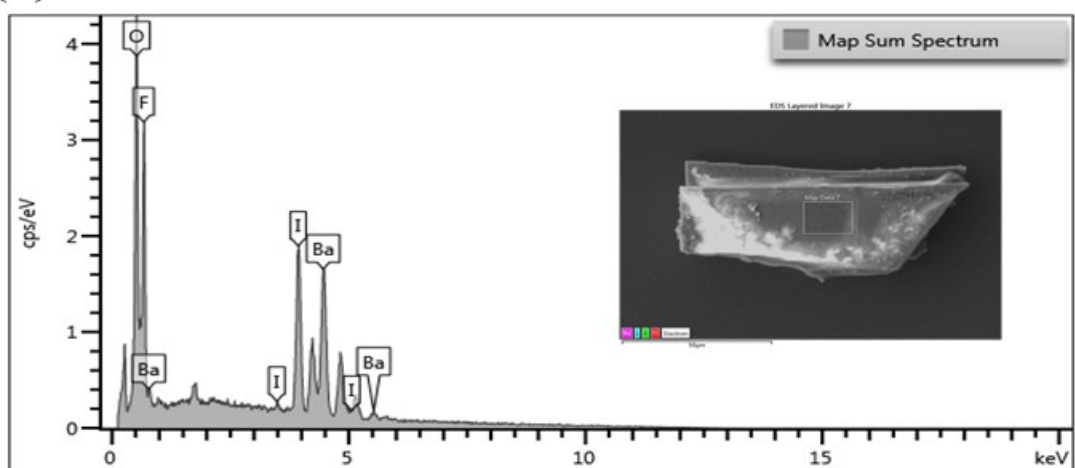



**Figure S3.** (a) 2D  $[\text{BaF}]_{\infty}$  double layers A of  $\text{BaI}_2\text{O}_5\text{F}_2$ ; (b) 2D  $[\text{BaF}]_{\infty}$  double layers B of  $\text{BaIO}_2\text{F}_3$ ; (c) 1D Ba-O-F chains of  $\text{Ba}(\text{IO}_2\text{F}_2)_2$ .

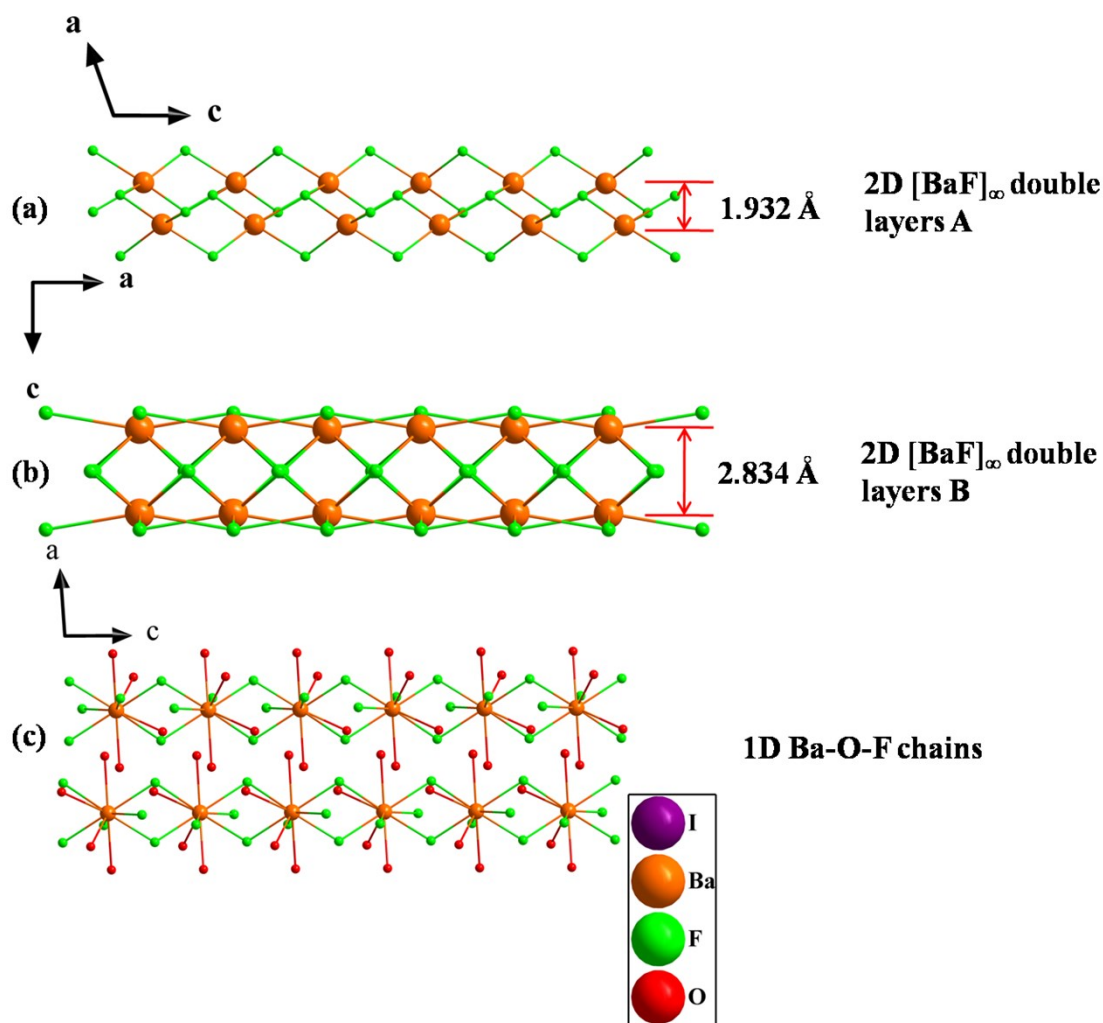

**Figure S4.** IR diffuse reflectance spectra of  $\text{BaI}_2\text{O}_5\text{F}_2$  (a) and  $\text{BaIO}_2\text{F}_3$  (b).

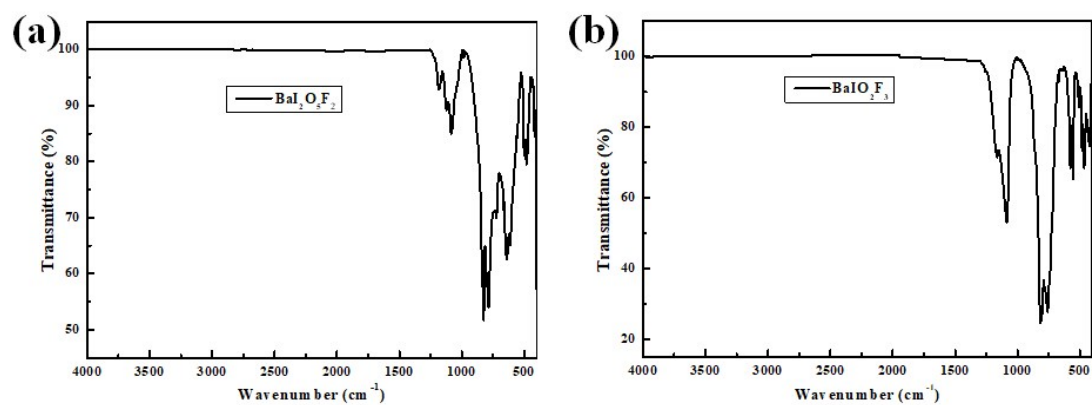

**Figure S5.** UV-vis-NIR diffuse-reflectance spectra of  $\text{BaI}_2\text{O}_5\text{F}_2$  (a) and  $\text{BaIO}_2\text{F}_3$  (b).

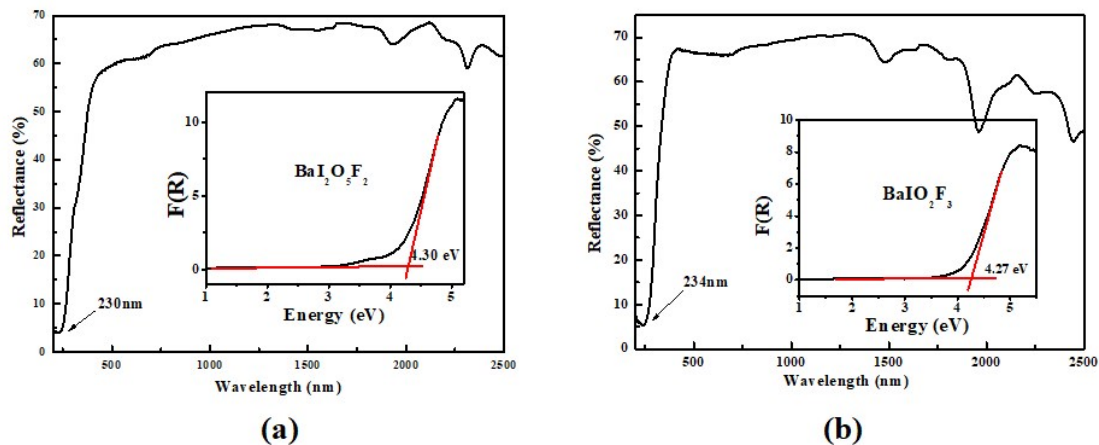

**Figure S6.** DSC and TG curves of  $\text{BaI}_2\text{O}_5\text{F}_2$  (a) and  $\text{BaIO}_2\text{F}_3$  (b).

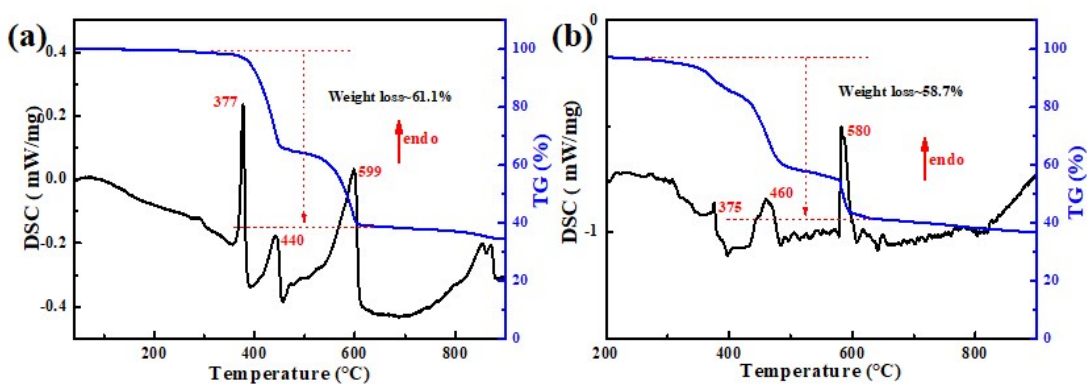

**Figure S7.** Calculated band structures of  $\text{BaI}_2\text{O}_5\text{F}_2$  (a) and  $\text{BaIO}_2\text{F}_3$  (b).

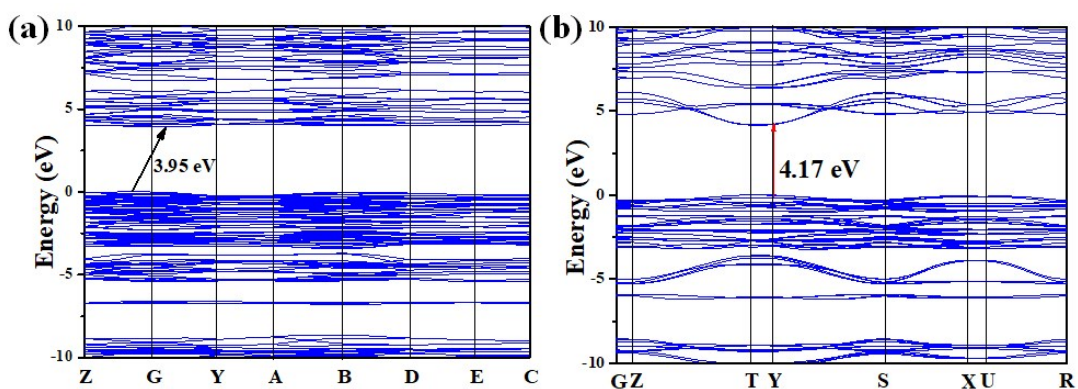

**Figure S8.** Arrangement of  $[\text{IO}_2\text{F}_2]^{2-}$  anions in  $\text{BaIO}_2\text{F}_3$  (a) and  $\text{Ba}(\text{IO}_2\text{F}_2)_2$  (b), the purple arrows indicate the directions of  $[\text{IO}_2\text{F}_2]^{2-}$  polyhedral.

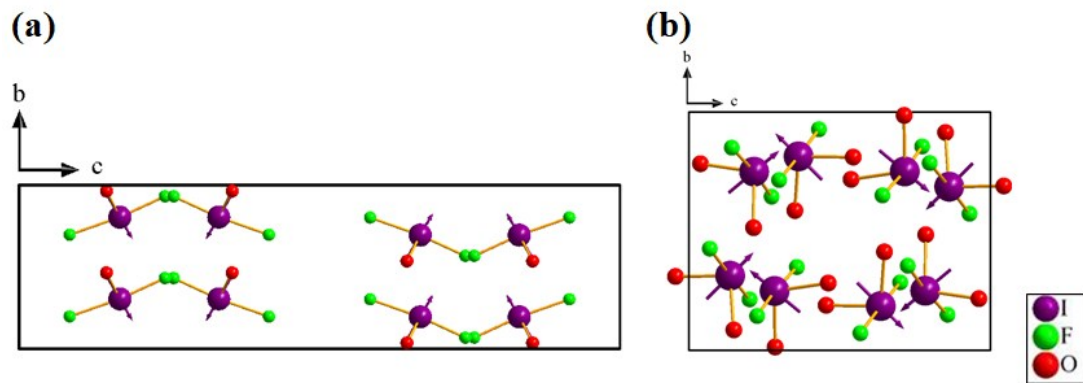

**Figure S9.** Calculated refractive index dispersion curves of  $\text{Ba}_2\text{O}_5\text{F}_2$  and  $\text{BaIO}_2\text{F}_3$ .

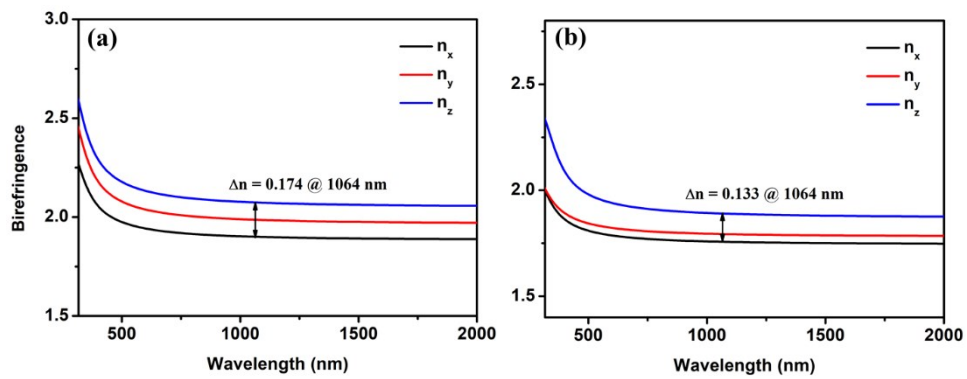

## Reference

1. R. R. Ryan and L. B. Aspery, The crystal structure of CsIOF<sub>4</sub>, *Acta Crystallogr.*, 1972, **28**, 979-981.
2. A. J. Edwards and A. A. K. Hana, Fluoride crystal structures. Part 34. Antimony pentafluoride–iodine trifluoride dioxide, *Dalton Trans.*, 1980, **9**, 1734-1736.
3. M. Zhang, C. Hu, T. Abudouwufu, Z. H. Yang and S. L. Pan, Functional materials design via structural regulation originated from ions introduction: A study case in cesium iodate system, *Chem. Mater.*, 2018, **30**, 1136-1145.
4. M. Gerken, J. P. Mack, G. J. Schrobilgen and R. J. Suontamo, Synthesis, vibrational and NMR spectroscopic characterization of [N(CH<sub>3</sub>)<sub>4</sub>][IO<sub>2</sub>F<sub>2</sub>] and X-ray crystal structure of [N(CH<sub>3</sub>)<sub>4</sub>]<sub>2</sub>[IO<sub>2</sub>F<sub>2</sub>][HF<sub>2</sub>], *J. Fluorine Chem.*, 2004, **125**, 1663-1670.
5. D. Fischer, T. M. Klapötke and J. Stierstorfer, Synthesis and characterization of guanidinium difluoroiodate, [C(NH<sub>2</sub>)<sub>3</sub>]<sup>+</sup>[IF<sub>2</sub>O<sub>2</sub>]<sup>-</sup> and its evaluation as an ingredient in agent defeat weapons, *Z. Anorg. Allg. Chem.*, 2011, **637**, 660-665.
6. J. P. Laval and N. J. Boukharrata, Sodium iodine(V) oxyfluoride, NaIO<sub>2</sub>F<sub>2</sub>, *Acta Crystallogr. C*, 2008, **64**, i47-i49.
7. L. Helmholz and M. T. Roger, The crystal structure of potassium fluoroiodate, KIO<sub>2</sub>F<sub>2</sub>, *J. Am. Chem. Soc.*, 1940, **62**, 1537-1542.
8. Q. Wu, H. M. Liu, F. C. Jiang, L. Kang, L. Yang, Z. S. Lin, Z. G. Hu, X. G. Chen, X. G. Meng and J. G. Qin, RbIO<sub>3</sub> and RbIO<sub>2</sub>F<sub>2</sub>: Two promising nonlinear optical materials in Mid-IR region and influence of partially replacing oxygen with fluorine for improving laser damage threshold, *Chem. Mater.*, 2016, **28**, 1413-1418.
9. M. Q. Gai, T. H. Tong, Y. Wang, Z. H. Yang and S. L. Pan, New Alkaline-earth metal fluoroiodates exhibiting large birefringence and short ultraviolet cutoff edge with highly polarizable (IO<sub>3</sub>F)<sup>2-</sup> units, *Chem. Mater.*, 2020, **32**, 5723-5728.
